# Supplementary material
Source: HighWire-hosted journal article supplement (https://www.ajnr.org/highwire/filestream/54294/field_highwire_adjunct_files/0/16-01060.pdf)
Supplement: 16-01060.pdf [file 16-01060.pdf]

**On-line Table: Summary recent multiple sclerosis medications**

| Drug                          | Mechanism of Action                                                         | Route of Administration | Adverse Effects                                                                                   |
|-------------------------------|-----------------------------------------------------------------------------|-------------------------|---------------------------------------------------------------------------------------------------|
| Interferon $\beta$            | Inhibition of T-lymphocyte proliferation                                    | IM/SC                   | Injection-site reactions, flu-like symptoms, LFT elevation, leukopenia, depression                |
| Glatiramer acetate            | Anti-inflammatory agent; exact MOA unclear                                  | SC                      | Injection-site reactions, benign systemic reactions (dyspnea, palpitations)                       |
| Teriflunomide (Aubagio)       | Dihydro-orotate dehydrogenase inhibitor                                     | Oral                    | Teratogenic risk, hepatotoxicity, headache, diarrhea, fatigue, hair thinning, influenza, and UTIs |
| Dimethyl fumarate (Tecfidera) | Immunomodulatory agent; poorly understood MOA                               | Oral                    | Flushing (dose-related), gastrointestinal adverse events, rarely PML                              |
| Natalizumab (Tysabri)         | Monoclonal antibody against the cell adhesion molecule $\alpha 4$ -integrin | IV infusion             | Infusion reactions, PML                                                                           |
| Fingolimod (Gilenya)          | Sphingosine 1-phosphate receptor modulator                                  | Oral                    | Bradycardia, macular edema, VZV infections, including encephalitis                                |
| Alemtuzumab (Lemtrada)        | Anti-CD52 monoclonal antibody                                               | IV infusion             | Autoimmune thyroid disorders, ITP, neuropathies                                                   |
| Mitoxantrone (Novantrone)     | Reduces proliferation of B- and T-cells                                     | IV                      | Cardiotoxicity, leukemia                                                                          |

**Note:**—IM indicates intramuscular; SC, subcutaneous; MOA, mechanism of action; LFT, liver function tests; VZV, varicella zoster virus; ITP, immune thrombocytopenic purpura; UTIs, urinary tract infections.
